# Supplementary material for: Antiplaque Effect of Essential Oils and 0.2% Chlorhexidine on an In Situ Model of Oral Biofilm Growth: A Randomised Clinical Trial
Source: PLoS One. 2015 Feb 17;10(2):e0117177. doi: 10.1371/journal.pone.0117177 (PMC4331278; doi:10.1371/journal.pone.0117177)
Supplement: S9 Table — Results of covering grade of the biofilm after 4D-CONTROL. (XLSX) [file pone.0117177.s011.xlsx]

## Sheet: Hoja1
Report of the primary data in terms of covering grade of the biofilm obtained per disk and volunteer after 4D-CONTROL.
Table S9. Results of covering grade of the biofilm after 4D-CONTROL
VOLUNTEER	DISK 1	DISK 2	DISK 3	DISK 4	DISK 5	DISK 6	TOTAL (MEAN)
1	92.39	90.51	93.58	90.06	91.73	81.63	89.9833
2	72.26	72.26	81.16	87.57	79.86	79.13	78.7067
3	74.87	82.46	82.01	81.83	96.91	85.59	83.945
4	90.15	89.75	82.48	87.31	78.89	74.76	83.89
5	73.89	60.9	47.09	80	84.38	89.41	72.6117
6	82.02	87.15	83.99	80.44	53.71	57.1	74.0683
7	88.64	92.34	77.417	79.641	80.614	77.102	82.6257
8	29.66	51.51	41.72	51.49	10.91	26.66	35.325
9	93.63	91.22	92.58	95.78	94.03	94.62	93.6433
10	90.07	88.02	73.42	75.21	98.9	97.64	87.21
11	76.285	62.215	81.215	74.8375	65.8625	72.94	72.2258
12	56.4475	30.2725	69.05	61.0125	51.0275	43.0975	51.8179
13	87.29	71.34	82.76	92.47	94.39	94.11	87.06
14	55.974	48.614	47.201	62.361	50.887	45.879	51.8193
15	66.574	85.375	90.178	85.493	87.204	80.95	82.629
							75.1707	*Mean of covering grade
	*The number present in the cell highlighted in yellow is the one which has been represented in Figure 6
